# Supplementary material for: Explaining stability of transition metal carbides – and why TcC does not exist
Source: Royal Society of Chemistry journal article supplement (doi:10.1039/c5ra24656c), 2016-01-01
Supplement: c5ra24656c5.pdf [file c5ra24656c5.pdf]

## Supplementary Materials

### Explaining stability of transition metal carbides –and why TcC does not exist

Qinggao Wang,<sup>1,5†</sup> Konstantin E. German,<sup>2,7</sup> Artem R. Oganov,<sup>3,1,4,6</sup> Huafeng Dong<sup>4</sup>, Oleg  
D. Feya<sup>1</sup>, Ya. V. Zubavichus,<sup>8</sup> and V. Yu. Murzin<sup>8</sup>

1 Moscow Institute of Physics and Technology, 9 Institutskiy Lane, Dolgoprudny City, Moscow Region, 141700, Russia

2 A.N. Frumkin Institute of Physical Chemistry and Electrochemistry RAS, Leninsky pr. 31, 119991 Moscow, Russia

3 Skolkovo Institute of Science and Technology, Skolkovo Innovation Center, 5 Nobel St., Moscow 143026, Russia

4 Department of Geosciences and Center for Materials by Design, Stony Brook University, Stony Brook, New York 11794, USA

5 Department of Physics and Electrical Engineering, Anyang Normal University, Anyang, Henan Province, 455000, the People's Republic of China

6 School of Materials Science and Engineering, Northwestern Polytechnical University, Xi'an, Shanxi 710072, People's Republic of China

7 Medical University Reaviz, Krasnobogatyrskaya 2, Moscow, Russia

8 Russian Research Center Kurchatov Institute, Moscow, Russia

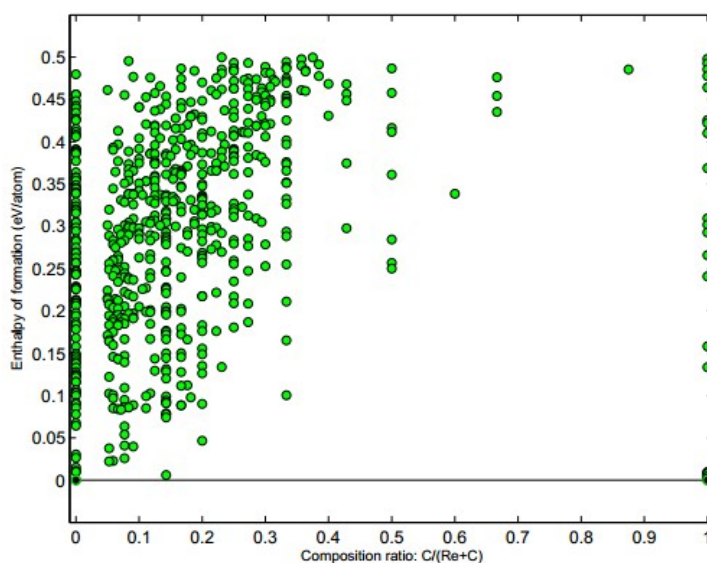

<sup>†</sup> Corresponding author: wangqinggao1984@126.com

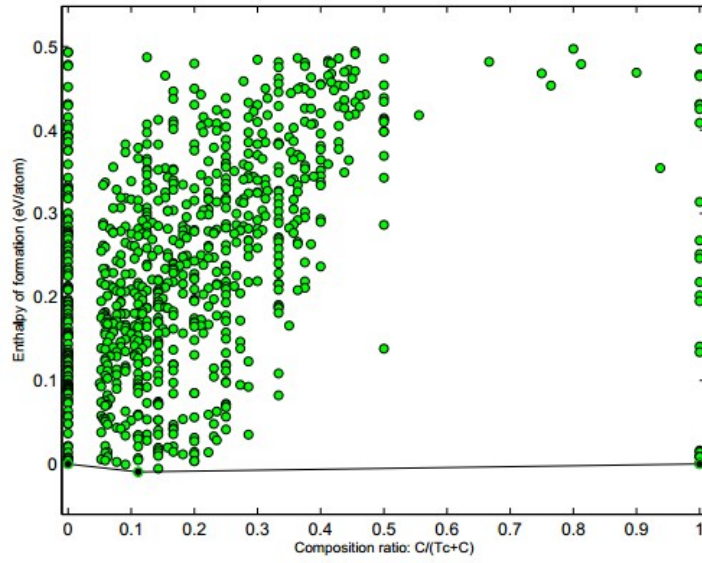

Figure caption 1: the convex hulls of Re-C and Tc-C systems, respectively, in which there is no Re carbide.

Figure caption 2: the CIF files of  $Tc_6C$ , cubic Tc,  $Tc_{10}C$  and  $Tc_8C$ .
